# Supplementary material
Source: PubMed Central journal article supplement (PMC4491037)
Supplement: NIHMS693705-supplement-1.pdf [file NIHMS693705-supplement-1.pdf]

Supplementary Figure 1

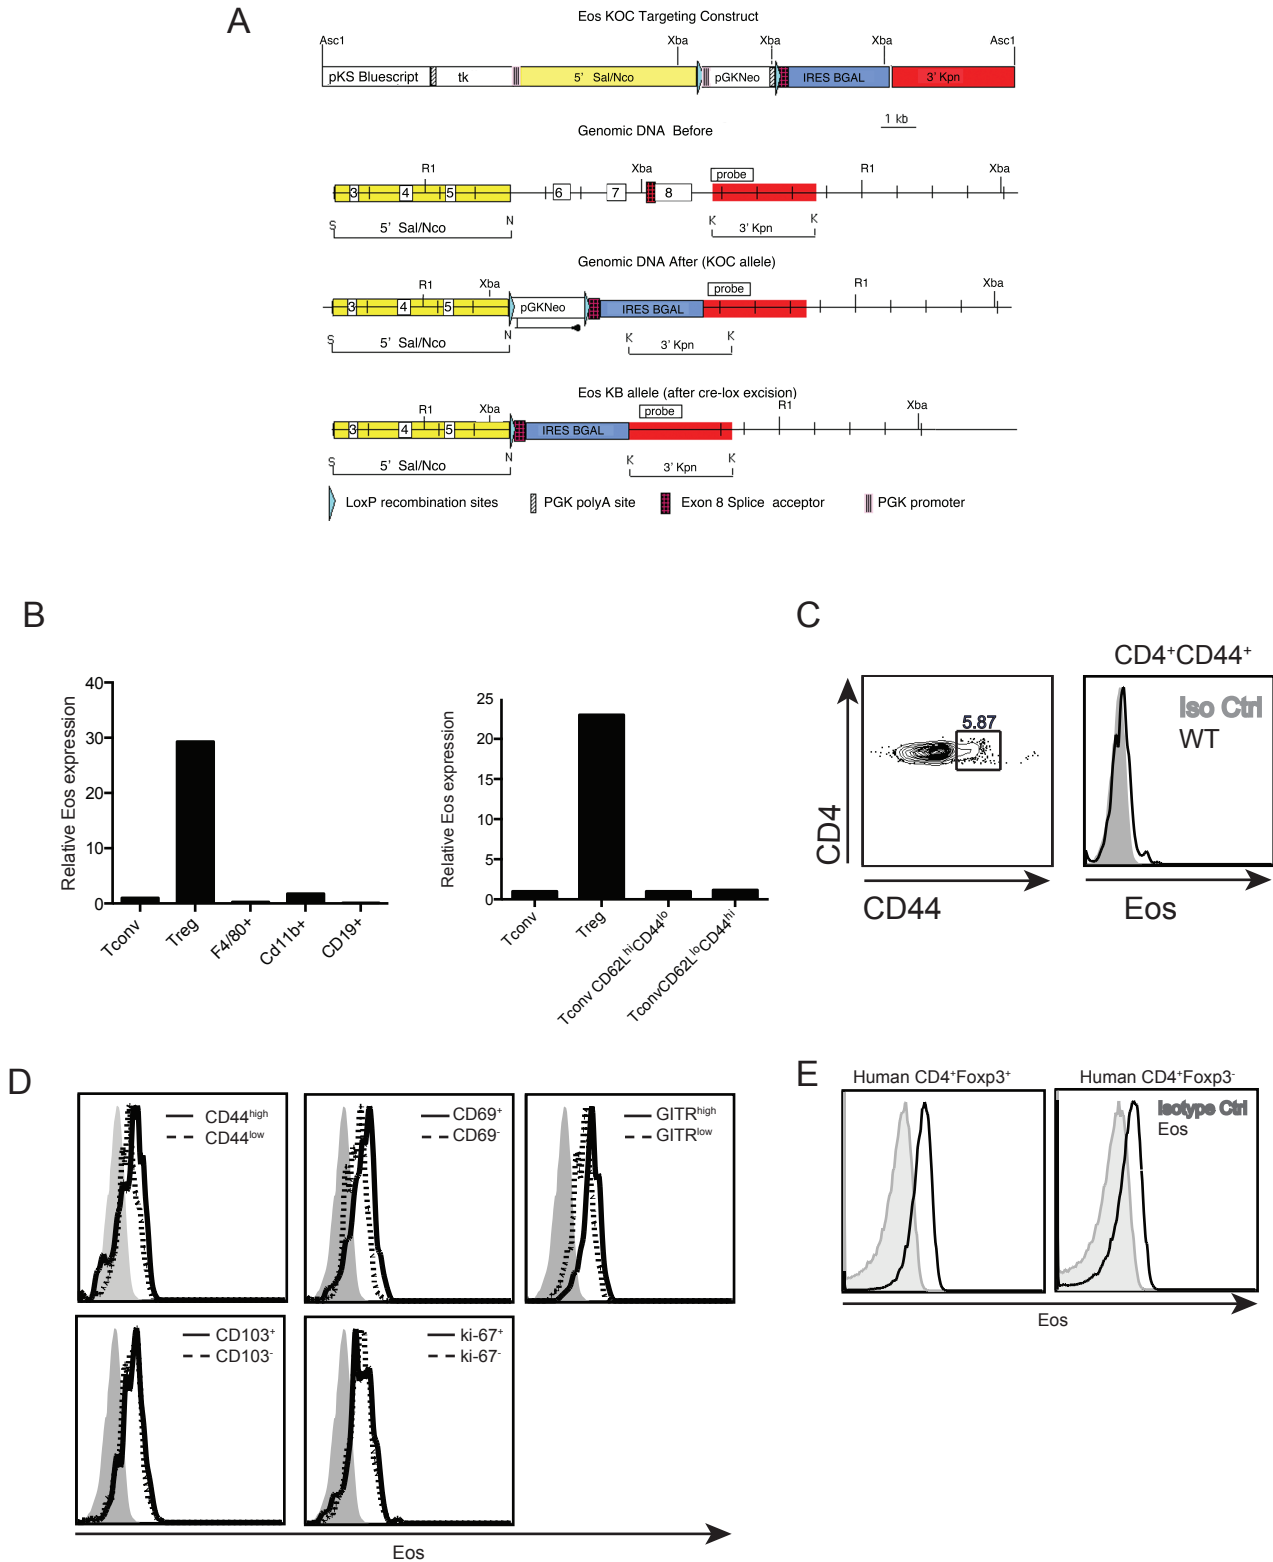

Supplemental Fig. 1. Eos expression in different immune cell types. (A) Targeting strategy for generation of Eos<sup>-/-</sup> mice. (B) Eos mRNA expression in different cell types that were purified by FACS sorting. (C) Eos expression on CD4<sup>+</sup>CD44<sup>+</sup> cells from naïve WT C57BL/6 mice. (D) Eos in combination with other phenotypic markers (CD44, CD69, G1TR, CD103 and ki-67) on Foxp3<sup>+</sup> Treg from naïve mice. (E) Eos expression on activated human CD4<sup>+</sup>Foxp3<sup>-</sup> and CD4<sup>+</sup>Foxp3<sup>+</sup> Treg.

## Supplementary Figure 2

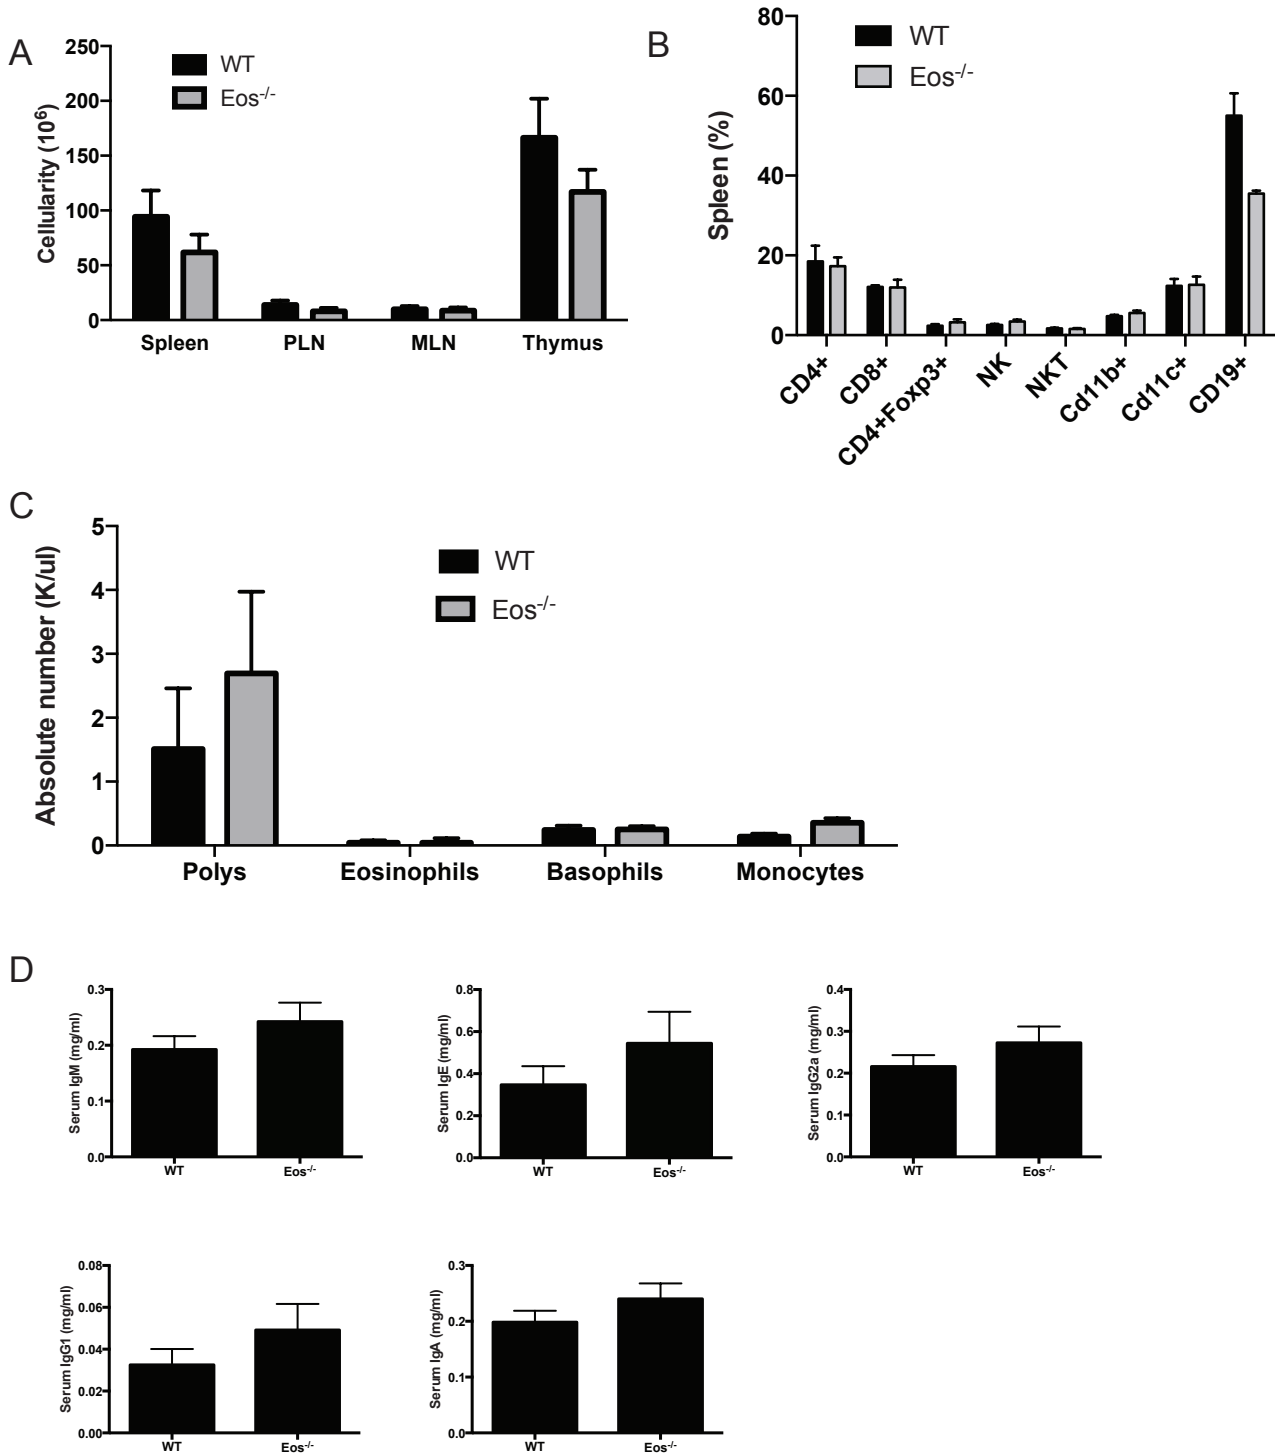

Supplemental Fig. 2. Phenotypic characterization of Eos<sup>-/-</sup> mice. (A) Cellularity in different organs, (B) Percentage of different cell types in the spleen, (C) complete blood count, and (D) Serum Ig levels in WT and Eos<sup>-/-</sup> mice.

### Supplemental Figure 3

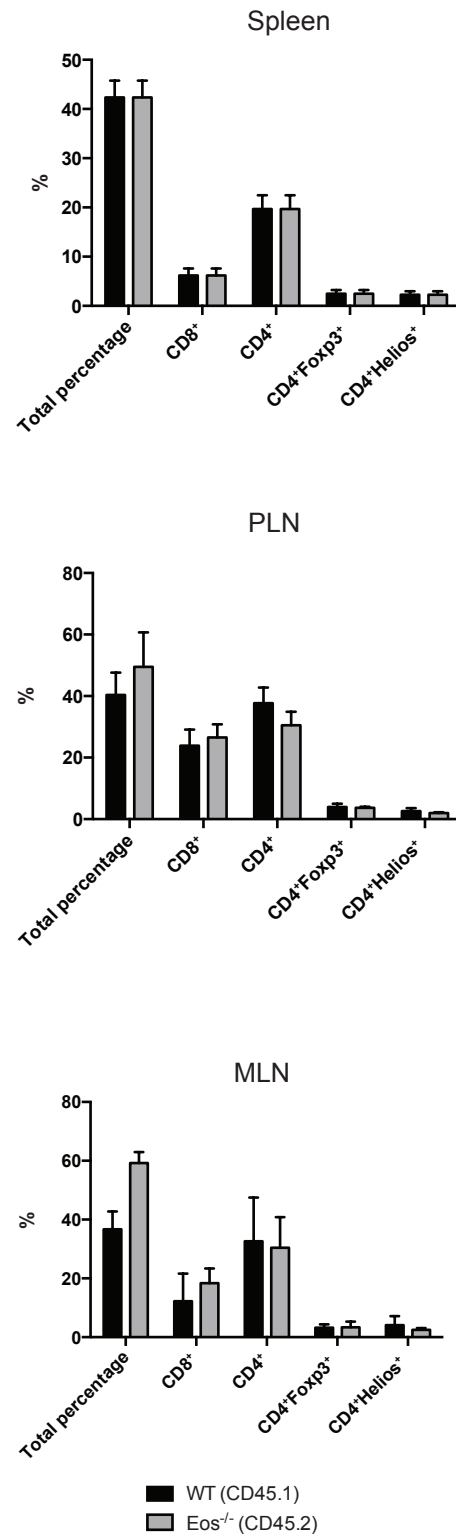

Supplemental Fig. 3. Reconstitution of different immune cell compartments in chimeric mice. Sublethally irradiated RAG2<sup>-/-</sup> mice were reconstituted with WT and Eos<sup>-/-</sup> BM cells at a 1:1 ration. Different organs were stained for cell analysis.
